1 Running title: HCAP Harmonization  
2 Harmonization of Later-Life Cognitive Function Across National Contexts: Results from the  
3 Harmonized Cognitive Assessment Protocols (HCAPs)  
4

5 Alden L. Gross, PhD<sup>1</sup> Chihua Li, PhD<sup>2,3</sup> Emily M. Briceno, PhD<sup>4</sup> Miguel Arce Rentería, PhD<sup>5</sup>  
6 Richard N. Jones, ScD<sup>6</sup> Kenneth M. Langa, MD<sup>2,7,8</sup> Jennifer J. Manly, PhD<sup>5</sup> Emma L. Nichols,  
7 PhD<sup>9</sup> David Weir, PhD<sup>2</sup> Rebeca Wong, PhD<sup>10</sup> Lisa Berkman, PhD<sup>11</sup> Jinkook Lee\*, PhD<sup>9</sup> Lindsay  
8 C. Kobayashi\*, PhD<sup>2,3</sup>

9 \*Co-senior authors

10

11 <sup>1</sup>Department of Epidemiology, Johns Hopkins Bloomberg School of Public Health, Baltimore,  
12 MD, USA; Center on Aging and Health, Johns Hopkins University, Baltimore, MD, USA

13 <sup>2</sup>Center for Social Epidemiology and Population Health, Department of Epidemiology, University  
14 of Michigan School of Public Health, Ann Arbor, MI, USA

15 <sup>3</sup>Survey Research Center, University of Michigan Institute for Social Research, Ann Arbor, MI,  
16 USA

17 <sup>4</sup>Department of Physical Medicine & Rehabilitation, University of Michigan Medical School, Ann  
18 Arbor, MI, USA

19 <sup>5</sup>Taub Institute for Research on Alzheimer's Disease and the Aging Brain, Department of  
20 Neurology, Columbia University College of Physicians and Surgeons, New York City,  
21 NY, USA

22 <sup>6</sup>Department of Psychiatry and Human Behavior, Warren Alpert Medical School, Brown  
23 University, Providence RI, USA

24 <sup>7</sup>Department of Internal Medicine, University of Michigan, Ann Arbor, MI, USA

25 <sup>8</sup>Veterans Affairs Center for Clinical Management Research, Ann Arbor, MI, USA

26 <sup>9</sup>Center for Economic and Social Research and Department of Economics, University of  
27 Southern California, Los Angeles, CA, USA

28 <sup>10</sup>University of Texas Medical Branch, Sealy Center on Aging, Galveston TX, United States

29 <sup>11</sup>Harvard Center for Population and Development Studies and Department of Social and  
30 Behavioral Sciences, TH Chan School of Public Health, Cambridge MA.

31  
32  
33  
34  
35  
36  
37  
38  
39  
40  
41  
42  
43  
44  
45  
46  
47  
48  
49  
50  
51  
52  
53  
54  
55  
56  
57  
58  
59  
60  
61  
62  
63  
64  
65

**Corresponding author:** Alden L. Gross, [agross14@jhu.edu](mailto:agross14@jhu.edu); Phone: 410-474-3386;  
Department of Epidemiology, Johns Hopkins Bloomberg School of Public Health, 616 N. Wolfe  
St., Baltimore, MD 21205, USA

Words: 268/300 (Abstract); 3495/3500 (text); 4 tables; 3 Figures; 3 Supplemental Tables; 1  
Supplemental Figure

### Abstract

**Background:** The Harmonized Cognitive Assessment Protocol (HCAP) is an innovative instrument for cross-national comparisons of later-life cognitive function, yet its suitability across diverse populations is unknown. We aimed to harmonize general and domain-specific cognitive scores from HCAPs across six countries, and evaluate precision and criterion validity of the resulting harmonized scores.

**Methods:** We statistically harmonized general and domain-specific cognitive function across the six publicly available HCAP partner studies in the United States, England, India, Mexico, China, and South Africa (N=21,141). We used an item banking approach that leveraged common cognitive test items across studies and tests that were unique to studies, as identified by a multidisciplinary expert panel. We generated harmonized factor scores for general and domain-specific cognitive function using serially estimated graded-response item response theory (IRT) models. We evaluated precision of the factor scores using test information plots and criterion validity using age, gender, and educational attainment.

**Findings:** IRT models of cognitive function in each country fit well. We compared measurement reliability of the harmonized general cognitive function factor across each cohort using test information plots; marginal reliability was high ( $r > 0.90$ ) for 93% of respondents across six countries. In each country, general cognitive function scores were lower with older ages and higher with greater levels of educational attainment.

**Interpretation:** We statistically harmonized cognitive function measures across six large, population-based studies of cognitive aging in the US, England, India, Mexico, China, and South Africa. Precision of the estimated scores was excellent. This work provides a foundation for international networks of researchers to make stronger inferences and direct comparisons of cross-national associations of risk factors for cognitive outcomes.

**Funding:** National Institute on Aging (R01 AG070953, R01 AG030153, R01 AG051125, U01 AG058499; U24 AG065182; R01AG051158)

66 Introduction

67 Alzheimer’s disease and related dementias, for which cognitive decline is the hallmark  
68 symptom, are a major global public health, clinical, and policy challenge. Although much  
69 research on risk and protective factors for dementia has been conducted in high-income  
70 countries it is anticipated that three-quarters of the 152 million persons with dementia will be  
71 living in low- and middle-income countries in the coming decades.<sup>1-3</sup> Differences in the  
72 distributions of potential risk factors and cultural and demographic factors that impact dementia  
73 across countries makes cross-national research imperative.

74  
75 To facilitate cross-national comparisons of later-life cognitive outcomes, measurement  
76 instruments must validly measure cognitive function across populations with diverse cultural,  
77 educational, social, economic, and political contexts. To that end, the Harmonized Cognitive  
78 Assessment Protocol (HCAP) has been developed and implemented in International Partner  
79 Studies (IPS) of the US Health and Retirement Study (HRS).<sup>4</sup> The HCAP network represents  
80 the largest concerted global effort to-date to conduct harmonized large-scale population-  
81 representative studies of cognitive aging and dementia.

82  
83 Although the HCAP was designed collaboratively to ensure its comparability across countries,  
84 necessary adaptations were made to its individual test items, test administrations, and scoring  
85 procedures to accommodate different languages, cultures, and levels of literacy and numeracy  
86 of its respondents.<sup>15</sup> The impacts of these adaptations on the performance, reliability, and  
87 validity of the HCAP cognitive test items are only beginning to be understood<sup>15,20</sup>, which may  
88 limit cross-national utility of the HCAP battery. The goal of this study was to conduct statistical  
89 harmonization of the HCAP instruments fielded in the United States, England, India, Mexico,  
90 China, and South Africa. Statistical harmonization involved assigning cognitive test items to  
91 domains, determining which test items were common and which were unique across countries,  
92 deriving harmonized factor scores for general and specific cognitive domains, and estimating  
93 the reliability and validity of the harmonized factor scores.

94  
95 Methods

96 Participants

97 The Health and Retirement Study in the United States (HRS) and its International Partner  
98 Studies (IPS) are large, population-based studies of aging. Between 2016 and 2019, six such  
99 studies administered Harmonized Cognitive Assessment Protocols (HCAPs) to participants from

100 each core IPS. They included the HRS, the English Longitudinal Study on Ageing (ELSA), the  
101 Longitudinal Aging Study in India (LASI), the Mexican Health and Aging Study (MHAS), the  
102 China Health and Retirement Longitudinal Study (CHARLS), and Health and Aging in Africa: A  
103 Longitudinal Study of an INDEPTH Community in South Africa (HAALSI). Details of HCAP  
104 administration in each cohort, eligibility, timing, and sample sizes are summarized in  
105 **Supplemental Table 1.**<sup>4-9</sup> The HCAP aims to provide a detailed assessment of cognitive  
106 function of older adults that is flexible, yet comparable across populations in countries with  
107 diverse cultural, educational, social, economic, and political contexts. The HCAP network  
108 ultimately intends to provide comparable estimates of dementia and mild cognitive impairment  
109 prevalence across countries, and to exploit cross-national variation in key risk and protective  
110 factors to better understand the determinants of later-life cognition, cognitive aging, and  
111 dementia.<sup>61</sup>

112

113 The HCAPs in the US and Mexico randomly sampled participants from the core studies who did  
114 not need a proxy interview in the previous core interview wave, and HRS-HCAP further included  
115 a random sampling of N=219 participants interviewed by proxy in the 2016 HRS core wave.<sup>4,7</sup>  
116 To ensure adequate sample sizes of participants with dementia, HCAPs in England, India, and  
117 South Africa recruited participants with low cognitive function.<sup>5,8,9</sup> All parent studies were  
118 nationally representative, with the exception of HAALSI in South Africa, which is a  
119 representative sample from the Agincourt sub-district in northeastern South Africa.<sup>10</sup> All  
120 participants consented to research and IRBs at local institutions approved each IPS and its  
121 respective HCAP.

122

123 Variables

124 Cognitive test battery. Details of the original battery of 17 cognitive tests in HCAP are available  
125 in Langa et al.<sup>4</sup> By design, each HCAP study administered as close to the same battery of tests  
126 as was feasible. We granularized these batteries to 30-51 cognitive test indicators in each  
127 HCAP, as shown in Figure 1 and Supplemental Table 2.

128

129 Each cognitive test item was assigned to a domain based on *a priori* theory, combined with  
130 empirical analyses demonstrating which test items fit well into a domain using factor analysis  
131 methods.<sup>11-13</sup> Assigning test items to domains is essential to statistical harmonization, also  
132 referred to as co-calibration, as this process relies on the presence of equivalent or comparable  
133 cognitive test items across one or more studies. If cognitive test items are presumed to be the

134 same across HCAP studies, but are in fact different (e.g., a different test; the same test with  
135 different stimuli, administration, or scoring procedures), such methodological differences could  
136 contribute to artifactual differences in the observed cognitive scores between studies. These  
137 artifactual differences would imperil the quality of cross-national inferences drawn from the  
138 derived summary cognitive scores.

139  
140 To determine the comparability of cognitive test items across HCAPs, we convened an expert  
141 panel of neuropsychologists, epidemiologists, persons with cultural/linguistic expertise, and  
142 psychometricians with working knowledge of cross-cultural neuropsychology and administration  
143 of the HCAPs to conduct pre-statistical harmonization of cognitive test items. This group used  
144 available materials including codebooks, interviewer training manuals, and personal  
145 communication with study investigators and coordinators to document differences in test item  
146 content and administration across HCAPs and to determine which differences were substantial  
147 and whether cultural or language demands differed for each test. Considerations made for each  
148 cognitive test item have been described previously.<sup>14,15</sup> Using the HRS HCAP as the reference,  
149 two neuropsychologists rated items from all other HCAPs as a confident linking item that is very  
150 likely to be comparable, a tentative linking item, or a non-linking item based on available  
151 information.<sup>15</sup>

152  
153 **Covariates**

154 Age, gender, and highest educational attainment were collected in core IPS interviews. We  
155 scaled educational attainment in each country to the 2011 International Standard Classification  
156 of Education.<sup>16</sup>

157  
158 **Analysis plan**

159 **Descriptive analyses.** We described demographic characteristics and cognitive tests using  
160 means with standard deviations and counts with percentages. We identified overlapping and  
161 unique cognitive test items by HCAP.

162  
163 **HCAP-specific factor analyses.** We estimated confirmatory factor analysis (CFA) models for  
164 cognitive domains of general cognitive function, memory, executive function, orientation, and  
165 language separately in each HCAP study, without regard to items in common across studies.  
166 The goal of this series of psychometric models was to illustrate that similar organizations of  
167 cognitive test items fit well across countries.<sup>12,17</sup> We ascertained model fit using three standard

168 absolute fit statistics: the Root Mean Square Error of Approximation (RMSEA), Comparative Fit  
169 Index (CFI), and Standardized Root Mean Residual (SRMR).<sup>18</sup> When possible, we attempted to  
170 improve model fit through the use of bifactor models to address additional correlations between  
171 theoretically similar items (e.g., Trail Making Test, parts A and B, or immediate and delayed  
172 recall).<sup>11,19</sup> Using the combination of these three fit statistics, we characterized model fit as  
173 perfect, good, adequate, or poor, using previously described rubric.<sup>12</sup>

174

175 **Statistical harmonization via item banking.** Following the estimation of CFAs within each  
176 HCAP study, we statistically harmonized scores for each cognitive domain across countries  
177 using an item banking approach.<sup>20</sup> A flowchart in **Supplemental Figure 1** illustrates this  
178 approach. For each cognitive domain, we serially estimated CFAs in each study, sequentially  
179 fixing model parameters for items determined to be comparable to those in previous studies to  
180 their corresponding values from previous studies. The order of studies was HRS-HCAP, ELSA-  
181 HCAP, LASI-DAD, Mex-Cog, CHARLS-HCAP, and HAALSI-HCAP. LASI-DAD was split into  
182 literate (N=1777, 43%) and illiterate (N=2139, 57%) subgroups due to administration differences  
183 in some tests. Because there is no natural scaling in latent variable space, the mean and  
184 variance of the factor score (general cognitive function, memory, executive function, orientation,  
185 or language) were set to 0 and 1, respectively, beginning with the HRS-HCAP as the reference.  
186 The factor score is estimated based on all of the items in the CFA. The CFA models estimated  
187 two relevant parameters for each cognitive test item: factor loadings and item thresholds (for  
188 categorical items) or intercepts (for continuous items). Factor loadings characterize how strongly  
189 correlated a given cognitive test item is with the other cognitive test items in the model. In  
190 general, loadings between 0.3 and 0.9 indicate an item is meaningfully related to the other  
191 items without overwhelming others in the model.<sup>11,19</sup> Item thresholds characterize the location  
192 along the factor at which the cognitive test item provides maximal information of underlying  
193 cognitive function.

194

195 Loadings and thresholds/intercepts from the CFA models in HRS-HCAP were saved for use in  
196 serially estimated CFAs in subsequent HCAPs (**Supplemental Figure 1**). After estimating a  
197 CFA model for the HRS-HCAP study, we next estimated a CFA model in ELSA-HCAP, in which  
198 item parameters for cognitive test items in common with the HRS-HCAP were constrained to  
199 those observed in the HRS-HCAP, and the mean and variance of the underlying trait were freely  
200 estimated. The same process was repeated for all other HCAPs. Parameters for cognitive test  
201 items from a given HCAP study that were not yet in the item bank were freely estimated, then

202 saved in the item bank for use when the next HCAP study was added to the item bank. In a final  
203 factor score-estimating CFA model for each cognitive domain, we estimated a CFA in the  
204 pooled sample of all HCAP studies, in which all parameters were fixed to previous values. We  
205 evaluated marginal reliability of the measurement models of each domain, calculated from the  
206 standard error of the measurement, in each HCAP.

207

208 **Differential item functioning.** The validity of the cross-national harmonization of cognitive  
209 function depends on the availability of common, equivalent cognitive test items across studies.  
210 While our expert panel identified equivalent linking items, it is possible to miss test differences  
211 that may have not been documented, that are due to unforeseen cultural differences, or for  
212 which there was insufficient documentation available. Thus, we statistically tested for differential  
213 item functioning (DIF) among candidate equivalent linking items between the HRS-HCAP and  
214 each study, by cognitive domain. We used multiple indicator, multiple cause (MIMIC) models to  
215 evaluate DIF by HCAP study membership.<sup>15,24</sup> Briefly, we first tested DIF amongst cognitive test  
216 items rated as confident linking items. Next, we tested for DIF among cognitive items rated as  
217 tentative linking items, treating as anchors the confident items that showed no DIF in the prior  
218 analysis. The magnitude of DIF attributable to a given cognitive test item is represented by an  
219 odds ratio (OR) for an item on an indicator for study membership; we considered non-negligible  
220 DIF as an OR outside the range of 0.66 to 1.5.<sup>25</sup> Large impact of DIF on participant's domain-  
221 level scores, called salient DIF, was evaluated by taking the difference between DIF-adjusted  
222 and non-DIF-adjusted scores, via enabling items that showed DIF to have different  
223 measurement model parameters across studies, and counting how many participant scores  
224 would differ by more than 0.3 SD units.<sup>26</sup>

225

226 **Validation.** To evaluate construct validity, we evaluated the patterns of factor scores by age,  
227 gender, and educational attainment by regressing general cognitive function on each of these  
228 characteristics, adjusting for the other characteristics. We hypothesized better cognitive function  
229 on average at younger ages and with more educational attainment.<sup>21,22</sup> With respect to gender,  
230 we hypothesized women are more disadvantaged in LMIC settings compared to men, given  
231 known gender-based societal inequalities in these settings that apply to determinants of later-life  
232 cognitive health such as educational opportunities.<sup>23</sup>

233

234 Descriptive analyses were conducted using Stata (Version 17, Stata Corp, College Station, TX).  
235 Factor analysis was conducted using Mplus.<sup>27</sup>

236

237

## Results

238 **Descriptive analyses.** There were N=21,141 participants across the six HCAP studies (**Table**  
239 **1**).

240

241 **Figure 1** (and **Supplemental Table 2**) displays the cognitive test items, stratified by cognitive  
242 domain to which tests were assigned. Of the 78 cognitive test items administered, 12 were  
243 judged by experts to be comparably administered in every HCAP. Overall, 15 distinct test items  
244 were assigned to the orientation domain, 14 distinct test items were assigned to the memory  
245 domain, 26 distinct cognitive test items were assigned to the executive functioning domain, and  
246 23 distinct cognitive test items were assigned to the language domain. For a given test item in  
247 each column, the presence of factor loadings from the item banking approach reflect decisions  
248 about the comparability of items made during prestatistical harmonization. For example, for  
249 orientation, we determined that asking for one's municipality in HAALSI-HCAP was comparable  
250 to asking for one's district in LASI-DAD. Notably, our prestatistical team decided *a priori* that the  
251 CERAD word recall test was administered differently in the HRS-HCAP and ELSA-HCAP as  
252 compared to LASI-DAD, Mex-Cog, and HAALSI-HCAP because participants in the former two  
253 countries were presented with the words both verbally and visually, but in the latter three  
254 countries, participants were presented with the words only verbally. Moreover, while all studies  
255 presented the words verbally, there was variation in the order in which words were presented  
256 (i.e., alternating per trial vs fixed).

257

258 **HCAP-specific factor analyses.** **Table 2** displays model fit statistics for measurement models  
259 of each of the five cognitive domains, by each of the seven study groups (six HCAP studies with  
260 LASI-DAD stratified by literacy). Of these 35 measurement models, 31% (11 models) were of  
261 perfect or good fit, 60% (21 models) were of adequate fit, and the remaining 9% (3 models)  
262 were of poor fit. Two of the three poorly fitting models were in the general cognitive function  
263 domain. Ultimately, we proceeded with these factor structures because most model fits were  
264 good or adequate.<sup>28</sup>

265

266 **Statistical harmonization via item banking.** The factor scores for general cognitive function,  
267 memory, language, and executive function were approximately normally distributed in each  
268 study (**Figure 2**). In contrast, the orientation factor showed a strong ceiling effect in each study  
269 (**Figure 2**). These ceiling effects are explained by low reliabilities (internal consistency based on



270 the standard error of the measurement model) of the factor scores for the orientation domain.  
271 The orientation factor provided low precision above scores of 0 as more than half of participants  
272 in HRS-HCAP and a plurality of those in other studies were at the ceiling because they  
273 answered all orientation items correctly (**Figure 3**). In comparison, across a broad range of  
274 values, the reliabilities of the general cognitive function and memory factors are uniformly high  
275 (above  $r=0.9$ ) for each HCAP between scores of -4 and 2, which encompasses over 90% of  
276 respondent scores for those domains. The language factor exhibited higher reliability at lower  
277 levels of language ability compared to higher levels, reflecting that almost all the language  
278 items, with the exception of animal fluency, tended to be easier questions about naming. For  
279 executive function, reliability was high for all studies except CHARLS-HCAP, which had just two  
280 test items measuring executive function.

281  
282 **Differential item functioning.** Evidence of DIF by study was present across cognitive test  
283 items (**Supplemental Table 3**). Of 78 unique cognitive test items, 23 showed DIF between  
284 HRS-HCAP and another study. Of these, 12 assessed language. With respect to the impact of  
285 DIF, 16.3% (N=290) of LASI-DAD orientation scores, 51.9% (N=326) of HAALSI-HCAP  
286 orientation scores, and 68.4% (N=6,668) of CHARLS-HCAP language factor score estimates  
287 demonstrated salient DIF (i.e., estimates differed by 0.3 units or more before vs. after  
288 accounting for DIF). Subsequent analyses, removing each item as a linking item one at a time,  
289 revealed that orientation to year was entirely responsible for all salient or impactful DIF in  
290 orientation for both LASI-DAD and HAALSI-HCAP (performance on this item was much lower in  
291 these studies, controlling for underlying orientation ability). Most of the salient DIF in CHARLS  
292 HCAP's language domain could be attributed to differences in two items: naming a described  
293 cactus and reading and following a command. After removing these items as linking items  
294 between CHARLS HCAP and other studies (**Table 3**), 16.8% of participant scores were affected  
295 by adjustment for DIF in the language domain for CHARLS-HCAP. Otherwise, less than 6% of  
296 scores for any domain in any study was considerably impacted by DIF adjustment. **Figure 1**  
297 reflects decisions from DIF analyses to relax assumptions of item equivalence for orientation to  
298 year between LASI-DAD and HAALSI-HCAP with other studies, and for naming a described  
299 cactus and reading and following a command between CHARLS-HCAP and other studies.

300  
301 **Validation.** Patterns of cognitive function aligned with hypothesized expectations: general  
302 cognitive function scores were, on average, lower at older ages and higher with greater  
303 education (**Table 4**). Women had higher average general cognitive function scores than men in

304 the HRS-HCAP and ELSA-HCAP, but lower average scores than men in LASI-DAD, Mex-Cog,  
305 CHARLS-HCAP, and HAALSI-HCAP.

306

### 307 Discussion

308 We investigated the performance of common and unique cognitive test items administered to  
309 21,141 older adults across six large harmonized studies of aging in the US, England, India,  
310 Mexico, China, and South Africa. We demonstrated these cognitive test items empirically reflect  
311 comparable domains of cognitive function among older adults living across these countries, they  
312 are reliable and valid measures of cognitive function, and useful for population-based research.  
313 Most importantly, we overcame differences in test administration due to language, literacy, and  
314 numeracy to statistically harmonize general and domain-specific cognitive function across these  
315 countries.

316

317 Over the past decade, a growing number of cross-national studies have examined risk factors of  
318 cognitive function decline and dementia, mostly using data from the HRS and its IPS.<sup>29–33</sup> Risk  
319 factors examined in these studies have included socioeconomic characteristics, health  
320 behaviors, physical and mental health conditions, and telomere length.<sup>21,34–55</sup> However, none of  
321 them conducted in-depth statistical harmonization of cognitive test items.

322

323 High-quality, harmonized scores for general and domain-specific cognitive function are crucial  
324 tools to promote valid cross-national comparisons of predictors and outcomes of cognitive aging  
325 in a rapidly aging world.<sup>17</sup> A recent Lancet Commission report identified 12 risk factors that had  
326 strong evidence of a causal risk for dementia: low education, hearing impairment, traumatic  
327 brain injury, hypertension, diabetes, excessive alcohol use, obesity, smoking, depression, social  
328 isolation, physical inactivity, and air pollution.<sup>56</sup> The harmonized cognitive function scores  
329 generated here can be used in pooled analyses to evaluate whether these risk factors have  
330 similar effects on cognitive function across global settings. Such knowledge could facilitate  
331 identification of contextual risk-modifying factors that could be intervened upon to reduce the  
332 risk of dementia in certain populations.<sup>57</sup> Further, common cognitive phenotypes could be used  
333 to improve the quality of population attributable risk estimates. Finally, common cognitive  
334 phenotypes could be used in dementia algorithms that are applied cross-nationally to generate  
335 prevalence and incidence estimates that are truly comparable across national settings.<sup>58</sup>

336

337 Prestatistical harmonization accompanied by statistical testing for differential item functioning  
338 (DIF) were two essential steps to the harmonization goal of this study. DIF can be introduced by  
339 methodological differences in test administration or scoring across studies, in addition to  
340 population-level differences that may alter responses to equivalent test items (e.g., differences  
341 in literacy, numeracy, and language). We evaluated the comparability of cognitive test items  
342 using a multidisciplinary team, which was a crucial component of this harmonization work.  
343 However, an expert's ability to identify measurement differences in cognitive test items across  
344 languages and cultures in items depends on the quality of available study documentation and  
345 level of expertise regarding the population under study. We are confident in our pre-statistical  
346 harmonization given the available documentation and our team's level of expertise, but  
347 adequate documentation is crucial. Statistical DIF testing identified only four of 20 domain-by-  
348 country categories in which the DIF made a difference for more than 10% of the sample,  
349 however in these cases the DIF proved critical to the estimation of scores.

350  
351 Strengths of this study include nationally representative sampling (in the case of HAALSI,  
352 regionally representative sampling) and comprehensive cognitive phenotyping with a common  
353 protocol. All data are publicly available (see **Supplemental Table 1**). Our harmonization  
354 approach based on item banking is readily scalable: as data from more HCAPs are released or  
355 become available, and as longitudinal data from existing HCAPs become available, they can be  
356 readily added to our item bank to be harmonized alongside the data shown here. Alongside  
357 these strengths, there are notable limitations. The quality of the linking between studies is best  
358 when there are more cognitive test items with richer distributions. This poses challenges when  
359 domains largely include relatively easy dichotomous items (e.g. language and orientation). A  
360 further limitation is that while we identified DIF, it was outside the scope of this study to  
361 characterize possible reasons for DIF across HCAP batteries in each item. This is a worthwhile  
362 aim for future research, especially as test batteries are adapted to additional countries and  
363 contexts.

364  
365 In conclusion, the HCAP suite of cognitive test items administered in the US, England, India,  
366 Mexico, China, and South Africa reflects a common structure of general- and domain-specific  
367 cognitive function across these diverse countries. Despite common protocols, there were  
368 necessary item adaptations to account for language, literacy, numeracy, and cultural differences  
369 across participating countries. Statistical harmonization involving an item-banking approach with  
370 identification of common and unique items allowed for the construction of reliable and valid

371 factor scores that account for these differences. Future cross-national comparisons of risk  
372 factors for cognitive aging outcomes, estimates of dementia prevalence and incidence, and  
373 estimates of population attributable fractions of risk factors should consider using harmonized  
374 factor scores to improve the quality of their analyses.

375

376

## 377 **References**

- 378 1. Nichols E, Steinmetz JD, Vollset SE, Fukutaki K, Chalek J, Abd-Allah F, et al. Estimation of the  
379 global prevalence of dementia in 2019 and forecasted prevalence in 2050: an analysis for the  
380 Global Burden of Disease Study 2019. *Lancet Public Health* 2022;**7**(2).
- 381 2. Patterson C. World Alzheimer Report 2018 - The state of the art of dementia research: New  
382 frontiers. *Alzheimer's Disease International (ADI): London, UK* 2018;
- 383 3. Prince M, Wimo A, Guerchet M, Gemma-Claire A, Wu YT, Prina M. World Alzheimer Report 2015:  
384 The Global Impact of Dementia - An analysis of prevalence, incidence, cost and trends.  
385 *Alzheimer's Disease International* 2015;
- 386 4. Langa KM, Ryan LH, McCammon RJ, Jones RN, Manly JJ, Levine DA, et al. The Health and  
387 Retirement Study Harmonized Cognitive Assessment Protocol Project: Study Design and  
388 Methods. *Neuroepidemiology* 2020;**54**(1).
- 389 5. Bassil DT, Farrell MT, Wagner RG, Brickman AM, Glymour MM, Langa KM, et al. Cohort Profile  
390 Update: Cognition and dementia in the Health and Aging in Africa Longitudinal Study of an  
391 INDEPTH community in South Africa (HAALSI dementia). *Int J Epidemiol* 2022;**51**.
- 392 6. Zhao Y, Hu Y, Smith JP, Strauss J, Yang G. Cohort profile: The China health and retirement  
393 longitudinal study (CHARLS). *Int J Epidemiol* 2014;**43**(1).
- 394 7. Mejia-Arango S, Nevarez R, Michaels-Obregon A, Trejo-Valdivia B, Mendoza-Alvarado LR, Sosa-  
395 Ortiz AL, et al. The Mexican Cognitive Aging Ancillary Study (Mex-Cog): Study Design and  
396 Methods. *Arch Gerontol Geriatr* 2020;**91**.
- 397 8. Lee J, Khobragade PY, Banerjee J, Chien S, Angrisani M, Perianayagam A, et al. Design and  
398 Methodology of the Longitudinal Aging Study in India-Diagnostic Assessment of Dementia (LASI-  
399 DAD). *J Am Geriatr Soc* 2020;**68**(S3).
- 400 9. Cadar D, Abell J, Matthews FE, Brayne C, David Batty G, Llewellyn DJ, et al. Cohort Profile Update:  
401 The Harmonised Cognitive Assessment Protocol Sub-study of the English Longitudinal Study of  
402 Ageing (ELSA-HCAP). *Int J Epidemiol* 2021;**50**.
- 403 10. Xavier Gómez-Olivé F, Montana L, Wagner RG, Kabudula CW, Rohr JK, Kahn K, et al. Cohort  
404 profile: Health and ageing in Africa: A longitudinal study of an indepth community in South Africa  
405 (HAALSI). *Int J Epidemiol* 2018;**47**.
- 406 11. Mukherjee S, Choi SE, Lee ML, Scollard P, Trittschuh EH, Mez J, et al. Cognitive domain  
407 harmonization and cocalibration in studies of older adults. *Neuropsychology* 2022;
- 408 12. Gross AL, Khobragade PY, Meijer E, Saxton JA. Measurement and Structure of Cognition in the  
409 Longitudinal Aging Study in India—Diagnostic Assessment of Dementia. *J Am Geriatr Soc*  
410 2020;**68**(S3).
- 411 13. Arce Rentería, M., Manly, J., Vonk, J., Mejia Arango, S., Michaels Obregon, A., Samper-Ternent,  
412 R., ... Tosto, G. (2022). Midlife Vascular Factors and Prevalence of Mild Cognitive Impairment in

- 413 Late-Life in Mexico. *Journal of the International Neuropsychological Society*, 28(4), 351-361.  
414 doi:10.1017/S1355617721000539.
- 415 14. Briceño EM, Gross AL, Giordani BJ, Manly JJ, Gottesman RF, Elkind MSV, et al. Pre-Statistical  
416 Considerations for Harmonization of Cognitive Instruments: Harmonization of ARIC, CARDIA, CHS,  
417 FHS, MESA, and NOMAS. *Journal of Alzheimer's Disease* 2021;**83**(4).
- 418 15. Briceño EM, Arce Rentería M, Gross AL, Jones RN, Gonzalez C, Wong R, et al. A cultural  
419 neuropsychological approach to harmonization of cognitive data across culturally and  
420 linguistically diverse older adult populations. *Neuropsychology* 2022;
- 421 16. UNESCO Institute for Statistics. International standard classification of education : ISCED 2011.  
422 *UNESCO Institute for Statistics* 2012;(84)
- 423 17. Kobayashi LC, Gross AL, Gibbons LE, Tommet D, Sanders RE, Choi SE, et al. You Say Tomato, I Say  
424 Radish: Can Brief Cognitive Assessments in the U.S. Health Retirement Study Be Harmonized With  
425 Its International Partner Studies? *J Gerontol B Psychol Sci Soc Sci* 2021;**76**(9).
- 426 18. Hu LT, Bentler PM. Cutoff criteria for fit indexes in covariance structure analysis: Conventional  
427 criteria versus new alternatives. *Structural Equation Modeling* 1999;**6**(1).
- 428 19. Gibbons RD, Bock RD, Hedeker D, Weiss DJ, Segawa E, Bhaumik DK, et al. Full-information item  
429 bifactor analysis of graded response data. *Appl Psychol Meas* 2007;**31**(1).
- 430 20. Vonk JM, Gross AL, Zammit AR, Bertola L, Avila JF, Jutten RJ, et al. Cross-national harmonization  
431 of cognitive measures across HRS HCAP (USA) and LASI-DAD (India). *PLoS One* 2022;**17**(2).
- 432 21. Clouston SAP, Smith DM, Mukherjee S, Zhang Y, Hou W, Link BG, et al. Education and Cognitive  
433 Decline: An Integrative Analysis of Global Longitudinal Studies of Cognitive Aging. *The Journals of*  
434 *Gerontology: Series B* 2020;**75**(7):e151–60.
- 435 22. Lenehan ME, Summers MJ, Saunders NL, Summers JJ, Vickers JC. Relationship between education  
436 and age-related cognitive decline: a review of recent research. *Psychogeriatrics* 2015;**15**(2):154–  
437 62.
- 438 23. Li R, Singh M. Sex differences in cognitive impairment and Alzheimer's disease. *Frontiers in*  
439 *Neuroendocrinology* 2014;**35**.
- 440 24. Jones RN. Identification of measurement differences between English and Spanish language  
441 versions of the Mini-Mental State Examination: Detecting differential item functioning using  
442 MIMIC modeling. *Med Care* 2006;**44**(11 SUPPL. 3).
- 443 25. Zwick R. A REVIEW OF ETS DIFFERENTIAL ITEM FUNCTIONING ASSESSMENT PROCEDURES:  
444 FLAGGING RULES, MINIMUM SAMPLE SIZE REQUIREMENTS, AND CRITERION REFINEMENT. *ETS*  
445 *Research Report Series* 2012;(1).
- 446 26. Crane PK, Gibbons LE, Narasimhalu K, Lai JS, Cella D. Rapid detection of differential item  
447 functioning in assessments of health-related quality of life: The Functional Assessment of Cancer  
448 Therapy. *Quality of Life Research* 2007;**16**(1).

- 449 27. Muthen LK, Muthen BO. Mplus user's guide: 1998-2012. Los Angeles, CA: *Muthen & Muthen*  
450 2012;8
- 451 28. Langa KM, Llewellyn DJ, Lang IA, Weir DR, Wallace RB, Kabeto MU, et al. Cognitive health among  
452 older adults in the United States and in England. *BMC Geriatr* 2009;**9**(1):23.
- 453 29. Skirbekk V, Loichinger E, Weber D. Variation in cognitive functioning as a refined approach to  
454 comparing aging across countries. *Proc Natl Acad Sci U S A* 2012;**109**(3): 770-4.
- 455 30. Savva GM, Maty SC, Setti A, Feeney J. Cognitive and physical health of the older populations of  
456 England, the United States, and Ireland: international comparability of the Irish Longitudinal  
457 Study on Ageing. *J Am Geriatr Soc* 2013; **61 Suppl 2**: S291-8.
- 458 31. Hong I, Reistetter TA, Díaz-Venegas C, Michaels-Obregon A, Wong R. Cross-national health  
459 comparisons using the Rasch model: findings from the 2012 US Health and Retirement Study and  
460 the 2012 Mexican Health and Aging Study. *Quality of Life Research* 2018;**27**(9): 2431-41.
- 461 32. de La Fuente J, Caballero FF, Verdes E, Rodríguez-Artalejo F, Cabello M, de La Torre-Luque A, et  
462 al. Are younger cohorts in the USA and England ageing better? *Int J Epidemiol* 2019;**48** (6):1906-  
463 13.
- 464 33. Lyu J, Lee C, Dugan E. Risk factors related to cognitive functioning: A cross-national comparison of  
465 U.S. and Korean older adults. *Int J Aging Hum Dev* 2014;**79**(1):81-101.
- 466 34. Weir D, Lay M, Langa K. Economic development and gender inequality in cognition: A comparison  
467 of China and India, and of SAGE and the HRS sister studies. *J Econ Ageing* 2014;**4**: 114-25.
- 468 35. Angrisani M, Lee J, Meijer E. The gender gap in education and late-life cognition: Evidence from  
469 multiple countries and birth cohorts. *J Econ Ageing* 2020;**16**.
- 470 36. Wu YT, Daskalopoulou C, Muniz Terrera G, Sanchez Niubo A, Rodríguez-Artalejo F, Ayuso-Mateos  
471 JL, et al. Education and wealth inequalities in healthy ageing in eight harmonised cohorts in the  
472 ATHLOS consortium: a population-based study. *Lancet Public Health*. 2020;**5**(7): e386-e94.
- 473 37. Faul JD, Ware EB, Kabeto MU, Fisher J, Langa KM. The Effect of Childhood Socioeconomic  
474 Position and Social Mobility on Cognitive Function and Change among Older Adults: A  
475 Comparison between the United States and England. *Journals of Gerontology - Series B*  
476 *Psychological Sciences and Social Sciences* 2021;**76**(Suppl 1): S51-S63.
- 477 38. Stefler D, Prina M, Wu YT, Sánchez-Niubò A, Lu W, Haro JM, et al. Socioeconomic inequalities in  
478 physical and cognitive functioning: Cross-sectional evidence from 37 cohorts across 28 countries  
479 in the ATHLOS project. *J Epidemiol Community Health* (1978) 2021;**75**(10): 980-6.
- 480 39. Yu X, Langa KM, Cho TC, Kobayashi LC. Association of Perceived Job Insecurity With Subsequent  
481 Memory Function and Decline Among Adults 55 Years or Older in England and the US, 2006 to  
482 2016. *JAMA Netw Open* 2022;**5**(4): e227060.
- 483 40. Ma Y, Liang L, Zheng F, Shi L, Zhong B, Xie W. Association Between Sleep Duration and Cognitive  
484 Decline. *JAMA Netw Open* 2020;**3**(9): e2013573.

- 485 41. Yoneda T, Lewis NA, Knight JE, Rush J, Vendittelli R, Kleineidam L, et al. The importance of  
486 engaging in physical activity in older adulthood for transitions between cognitive status  
487 categories and death: A coordinated analysis of 14 longitudinal studies. *J Gerontol A Biol Sci Med*  
488 *Sci.* 2021;**76**(9): 1661-7.
- 489 42. Kelly A, Calamia M, Koval A, Terrera GM, Piccinin AM, Clouston S, et al. Independent and  
490 interactive impacts of hypertension and diabetes mellitus on verbal memory: A coordinated  
491 analysis of longitudinal data from England, Sweden, and the United States. *Psychol Aging*  
492 2016;**31**(3): 262-73.
- 493 43. Maharani A, Dawes P, Nazroo J, Tampubolon G, Pendleton N. Visual and hearing impairments are  
494 associated with cognitive decline in older people. *Age Ageing* 2018;**47**(4): 575-81.
- 495 44. Duggan EC, Piccinin AM, Clouston S, Koval A v., Robitaille A, Zammit AR, et al. A Multi-study  
496 Coordinated Meta-analysis of Pulmonary Function and Cognition in Aging. *J Gerontol A Biol Sci*  
497 *Med Sci.* 2019;**74**(11): 1793-804.
- 498 45. Yu Z bin, Zhu Y, Li D, Wu MY, Tang ML, Wang JB, et al. Association between visit-to-visit variability  
499 of HbA1c and cognitive decline: a pooled analysis of two prospective population-based cohorts.  
500 *Diabetologia* 2020;**63**(1): 85-94.
- 501 46. Jindra C, Li C, Tsang RSM, Bauermeister S, Gallacher J. Depression and memory function –  
502 evidence from cross-lagged panel models with unit fixed effects in ELSA and HRS. *Psychol Med*  
503 2022;**52**(8):1428–36.
- 504 47. Sutin AR, Luchetti M, Stephan Y, Terracciano A. Purpose in Life and Motoric Cognitive Risk  
505 Syndrome: Replicable Evidence from Two National Samples. *J Am Geriatr Soc* 2021;**69**(2): 381-8.
- 506 48. Ma Y, Hua R, Yang Z, Zhong B, Yan L, Xie W. Different hypertension thresholds and cognitive  
507 decline: a pooled analysis of three ageing cohorts. *BMC Med* 2021;**19**(1): 287.
- 508 49. Zammit AR, Piccinin AM, Duggan EC, Koval A, Clouston S, Robitaille A, et al. A Coordinated Multi-  
509 study Analysis of the Longitudinal Association between Handgrip Strength and Cognitive Function  
510 in Older Adults. *J Gerontol A Biol Sci Med Sci* 2021;**76**(2): 229-41.
- 511 50. Li C, Zhu Y, Ma Y, Hua R, Zhong B, Xie W. Association of Blood Pressure With Cognitive Decline,  
512 Dementia, and Mortality. *J Am Coll Cardiol* 2022;**79**(14):1321–35.
- 513 51. Sutin AR, Luchetti M, Stephan Y, Strickhouser JE, Terracciano A. The association between  
514 purpose/meaning in life and verbal fluency and episodic memory: A meta-analysis of >140,000  
515 participants from up to 32 countries. *Int Psychogeriatr* 2022; **34**(3): 263-73.
- 516 52. Zhu Y, Li C, Xie W, Zhong B, Wu Y, Blumenthal JA. Trajectories of depressive symptoms and  
517 subsequent cognitive decline in older adults: A pooled analysis of two longitudinal cohorts. *Age*  
518 *Ageing* 2022;**51**(1).
- 519 53. Zhu Y, Li C, Wu T, Wang Y, Hua R, Ma Y, et al. Associations of cumulative depressive symptoms  
520 with subsequent cognitive decline and adverse health events: Two prospective cohort studies. *J*  
521 *Affect Disord* 2023;**320**:91–7.



- 522 54. Zhan Y, Clements MS, Roberts RO, Vassilaki M, Druliner BR, Boardman LA, et al. Association of  
523 telomere length with general cognitive trajectories: a meta-analysis of four prospective cohort  
524 studies. *Neurobiol Aging* 2018;**69**: 111-6.
- 525 55. Livingston G, Huntley J, Sommerlad A, Ames D, Ballard C, Banerjee S, et al. Dementia prevention,  
526 intervention, and care: 2020 report of the Lancet Commission. *The Lancet* 2020;**396**.
- 527 56. Rose G. Sick individuals and sick populations. *Int J Epidemiol.* 2001;**30**(3).
- 528 57. Prince M, Bryce R, Albanese E, Wimo A, Ribeiro W, Ferri CP. The global prevalence of dementia: A  
529 systematic review and metaanalysis. *Alzheimer's and Dementia* 2013;**9**.
- 530 58. Gross AL, Crane PK, Gibbons LE, Manly JJ, Romero H, Thomas M, et al. Effects of education and  
531 race on cognitive decline: An integrative study of generalizability versus study-specific results.  
532 *Psychol Aging* 2015;**30**(4).
- 533 59. Taasobshirazi G, Wang S. THE PERFORMANCE OF THE SRMR, RMSEA, CFI, AND TLI: AN  
534 EXAMINATION OF SAMPLE SIZE, PATH SIZE, AND DEGREES OF FREEDOM. *Journal of Applied*  
535 *Quantitative Method* 2016;**11**(3).
- 536 60. Brown T.A., Confirmatory factor analysis for applied research. *Guilford publications* 2015;**5**.
- 537 61. Langa, K. M., Ryan, L. H., McCammon, R. J., Jones, R. N., Manly, J. J., Levine, D. A., Sonnega, A.,  
538 Farron, M., & Weir, D. R. (2020). The Health and Retirement Study Harmonized Cognitive  
539 Assessment Protocol Project: Study Design and Methods. *Neuroepidemiology*, 54(1), 64-74.  
540 <https://doi.org/10.1159/000503004>

Table 1. Sample characteristics of included HCAP studies (N=21,141)

| Characteristics                   | Overall sample | HRS-HCAP    | ELSA-HCAP  | LASI-DAD    | Mex-Cog     | CHARLS - HCAP | HAALSI-HCAP |
|-----------------------------------|----------------|-------------|------------|-------------|-------------|---------------|-------------|
| Sample size, n                    | 21141          | 3347        | 1273       | 4096        | 2042        | 9755          | 628         |
| Age, years, mean (SD)             | 72.7 (8.9)     | 76.6 (7.5)  | 75.8 (7.0) | 69.7 (7.6)  | 68.1 (9.0)  | 68.5 (6.5)    | 69.3 (11.5) |
| Female gender, n (%)              | 16404 (55.7)   | 2020 (60.4) | 700 (55.0) | 2207 (53.9) | 1203 (58.9) | 4960 (50.8)   | 387 (61.6)  |
| Education, n (%)                  |                |             |            |             |             |               |             |
| No or Early Childhood Education   | 8862 (42.0)    | 22 (0.7)    | 3 (0.2)    | 2558 (62.5) | 1023 (50.5) | 4909 (50.3)   | 347 (55.3)  |
| Primary education (US grades 1-6) | 3674 (17.4)    | 131 (3.9)   | 0 (0.0)    | 527 (12.9)  | 452 (22.3)  | 2355 (24.1)   | 209 (33.3)  |
| Lower secondary (US grades 7-9)   | 3160 (15.0)    | 454 (13.6)  | 486 (39.3) | 314 (7.7)   | 317 (15.7)  | 1562 (16.0)   | 27 (4.3)    |
| Upper secondary (US grades 10-12) | 3465 (16.4)    | 1773 (53.0) | 303 (24.5) | 505 (12.3)  | 60 (3.0)    | 792 (8.1)     | 32 (5.1)    |
| Any college                       | 1924 (9.1)     | 965 (28.8)  | 446 (36.0) | 192 (4.7)   | 172 (8.5)   | 137 (1.4)     | 12 (1.9)    |

Table 2. Model fit statistics of CFAs for each cognitive domain in each study: Results from HCAP studies (N=21,141)

| Cognitive domain      | Study                 | Number of items | RMSEA | CFI   | SRMR  | Bifactor structure | Summary of fit |
|-----------------------|-----------------------|-----------------|-------|-------|-------|--------------------|----------------|
| General cognition     | HRS HCAP              | 45              | 0.035 | 0.925 | 0.078 | Yes                | Adequate       |
| General cognition     | ELSA HCAP             | 41              | 0.027 | 0.968 | 0.089 | Yes                | Poor           |
| General cognition     | LASI-DAD - literate   | 48              | 0.033 | 0.904 | 0.066 | Yes                | Adequate       |
| General cognition     | LASI-DAD - illiterate | 48              | 0.036 | 0.904 | 0.063 | Yes                | Adequate       |
| General cognition     | Mex-Cog               | 40              | 0.040 | 0.932 | 0.072 | Yes                | Adequate       |
| General cognition     | CHARLS HCAP           | 31              | 0.032 | 0.949 | 0.051 | No                 | Adequate       |
| General cognition     | HAALSI HCAP           | 51              | 0.043 | 0.913 | 0.122 | Yes                | Poor           |
| Memory                | HRS HCAP              | 11              | 0.045 | 0.980 | 0.023 | Yes                | Good           |
| Memory                | ELSA HCAP             | 11              | 0.060 | 0.971 | 0.038 | Yes                | Adequate       |
| Memory                | LASI-DAD - literate   | 11              | 0.046 | 0.978 | 0.027 | Yes                | Good           |
| Memory                | LASI-DAD - illiterate | 11              | 0.049 | 0.965 | 0.031 | Yes                | Good           |
| Memory                | Mex-Cog               | 10              | 0.048 | 0.985 | 0.033 | Yes                | Good           |
| Memory                | CHARLS HCAP           | 5               | 0.047 | 0.984 | 0.020 | No                 | Good           |
| Memory                | HAALSI HCAP           | 9               | 0.026 | 0.995 | 0.018 | Yes                | Good           |
| Orientation           | HRS HCAP              | 10              | 0.028 | 0.971 | 0.064 | No                 | Adequate       |
| Orientation           | ELSA HCAP             | 9               | 0.010 | 0.999 | 0.052 | No                 | Adequate       |
| Orientation           | LASI-DAD - literate   | 10              | 0.053 | 0.924 | 0.077 | Yes                | Adequate       |
| Orientation           | LASI-DAD - illiterate | 10              | 0.049 | 0.945 | 0.064 | Yes                | Adequate       |
| Orientation           | Mex-Cog               | 8               | 0.062 | 0.924 | 0.066 | No                 | Adequate       |
| Orientation           | CHARLS HCAP           | 10              | 0.043 | 0.968 | 0.051 | No                 | Adequate       |
| Orientation           | HAALSI HCAP           | 10              | 0.032 | 0.989 | 0.069 | No                 | Adequate       |
| Language              | HRS HCAP              | 14              | 0.020 | 0.971 | 0.071 | No                 | Adequate       |
| Language              | ELSA HCAP             | 12              | 0.007 | 0.997 | 0.070 | Yes                | Adequate       |
| Language              | LASI-DAD - literate   | 14              | 0.034 | 0.897 | 0.070 | Yes                | Adequate       |
| Language              | LASI-DAD - illiterate | 14              | 0.032 | 0.949 | 0.050 | Yes                | Adequate       |
| Language              | Mex-Cog               | 13              | 0.016 | 0.986 | 0.073 | Yes                | Adequate       |
| Language              | CHARLS HCAP           | 13              | 0.029 | 0.960 | 0.046 | No                 | Good           |
| Language              | HAALSI HCAP           | 16              | 0.039 | 0.971 | 0.127 | Yes                | Poor           |
| Executive functioning | HRS HCAP              | 8               | 0.076 | 0.973 | 0.020 | Yes                | Adequate       |

|                       |                       |    |       |       |       |     |          |
|-----------------------|-----------------------|----|-------|-------|-------|-----|----------|
| Executive functioning | ELSA HCAP             | 8  | 0.080 | 0.966 | 0.020 | Yes | Adequate |
| Executive functioning | LASI-DAD - literate   | 10 | 0.029 | 0.989 | 0.024 | No  | Good     |
| Executive functioning | LASI-DAD - illiterate | 10 | 0.038 | 0.975 | 0.034 | No  | Good     |
| Executive functioning | Mex-Cog               | 7  | 0.043 | 0.995 | 0.018 | Yes | Good     |
| Executive functioning | CHARLS HCAP           | 2  | 0.000 | 1.000 | 0.000 | No  | Perfect  |
| Executive functioning | HAALSI HCAP           | 12 | 0.076 | 0.922 | 0.059 | Yes | Adequate |

Legend. CFI: confirmatory fit index; RMSEA: root mean square error of approximation; SRMR: standardized root mean squared residual.

Model fit was considered perfect if  $CFI = 1$  and  $RMSEA = 0$  and  $SRMR = 0$ , good if  $CFI \geq 0.95$  and  $RMSEA \leq 0.05$  and  $SRMR \leq 0.05$ , adequate if  $CFI \geq 0.90$  and  $RMSEA \leq 0.08$  and  $SRMR \leq 0.08$ , and poor if either  $CFI < 0.9$  or  $RMSEA > 0.08$  or  $SRMR > 0.08$ .

We chose this combination because each fit statistic has advantages and disadvantages. Together, these three statistics considered in conjunction minimize the risk of choosing a bad model. Although low SRMR implies low model residuals, it does not incorporate model complexity and may be partial to overly complex models or models with larger sample sizes. The RMSEA provides an index of model discrepancy per degree of freedom (which accounts for model complexity), but tends to improve with larger sample size. The CFI compares an estimated model with a hypothetical null baseline model.

Table 3. Number of participants in each study and for each domain whose scores show salient DIF: Results from HCAP studies (N=21,141)

| Domain             | HRS HCAP  | ELSA HCAP | LASI-DAD  | Mex-Cog    | CHARLS HCAP  | HAALSI   |
|--------------------|-----------|-----------|-----------|------------|--------------|----------|
|                    | n (%)     | n (%)     | n (%)     | n (%)      | n (%)        | n (%)    |
| Memory             | Reference | 2 (0.2%)  | 1 (0.1%)  | 105 (5.1%) | 216 (2.2%)   | 0 (0%)   |
| Orientation        | Reference | 22 (1.7%) | 0 (0%)    | 0 (0%)     | 23 (0.3%)    | 0 (0%)   |
| Language/fluency   | Reference | 57 (4.5%) | 23 (1.3%) | 50 (2.5%)  | 1637 (16.8%) | 6 (1.0%) |
| Executive function | Reference | 0 (0%)    | 0 (0%)    | No overlap | No overlap   | 0 (0%)   |

Legend. Impact of differential item functioning (DIF) was calculated as the difference between DIF-adjusted and non-DIF-adjusted factor scores. This table shows the number of participants in each study and for each domain whose DIF-adjusted scores differed by more than 0.3 standard deviations from non-DIF-adjusted scores.

Table 4. Validation of the general cognitive function factor: Results from HCAP studies (N=21,141)

| Covariate                         | Overall sample        | HRS-HCAP              | ELSA-HCAP             | LASI-DAD              | Mex-Cog               | CHARLS-HCAP           | HAALSI-HCAP           |
|-----------------------------------|-----------------------|-----------------------|-----------------------|-----------------------|-----------------------|-----------------------|-----------------------|
|                                   | Beta coefficient (SE) | Beta coefficient (SE) | Beta coefficient (SE) | Beta coefficient (SE) | Beta coefficient (SE) | Beta coefficient (SE) | Beta coefficient (SE) |
| Female gender                     | 0.017 (0.011)         | 0.19 (0.03)           | 0.06 (0.05)           | -0.06 (0.03)          | -0.10 (0.03)          | -0.07 (0.02)          | -0.22 (0.04)          |
| Age group                         |                       |                       |                       |                       |                       |                       |                       |
| 50-59 years                       | .40 (.043)            | N/A                   | N/A                   | N/A                   | 0.28 (0.05)           | N/A                   | 0.46 (0.07)           |
| 60-69 years                       | REF                   | REF                   | REF                   | REF                   | REF                   | REF                   | REF                   |
| 70-79 years                       | .14 (.014)            | -0.30 (0.04)          | -0.57 (0.07)          | -0.31 (0.03)          | -0.54 (0.05)          | -0.25 (0.02)          | -0.38 (0.07)          |
| 80-89 years                       | -.057 (.017)          | -0.89 (0.04)          | -1.23 (0.07)          | -0.66 (0.04)          | -1.17 (0.06)          | -0.74 (0.04)          | -0.72 (0.07)          |
| 90+ years                         | -.34 (.032)           | -1.45 (0.07)          | -1.80 (0.14)          | -1.18 (0.09)          | -1.61 (0.14)          | -0.99 (0.17)          | -0.95 (0.14)          |
| Education                         |                       |                       |                       |                       |                       |                       |                       |
| No or Early Childhood education   | -1.16 (0.017)         | -0.55 (0.20)          | -1.01 (0.58)          | -0.96 (0.04)          | -1.26 (0.05)          | -1.13 (0.02)          | -0.96 (0.12)          |
| Primary education (US grades 1-6) | -0.36 (0.019)         | -0.50 (0.09)          | N/A                   | -0.26 (0.05)          | -0.42 (0.05)          | -0.35 (0.03)          | -0.32 (0.12)          |
| Lower secondary (US grades 7-9)   | REF                   | REF                   | REF                   | REF                   | REF                   | REF                   | REF                   |
| Upper secondary (US grades 10-12) | 0.40 (0.020)          | 0.72 (0.05)           | 0.52 (0.07)           | 0.34 (0.05)           | 0.17 (0.10)           | 0.26 (0.03)           | 0.47 (0.16)           |
| Any college                       | 0.84 (0.023)          | 1.18 (0.05)           | 0.76 (0.07)           | 0.55 (0.06)           | 0.57 (0.07)           | 0.50 (0.07)           | 0.78 (0.21)           |

Legend. Beta coefficients represent overall and study-specific differences in general cognitive functioning between a given exposure grouping and the reference category. For age, persons aged 60-69 comprised the reference group. For education, persons with a lower secondary education comprised the reference group.

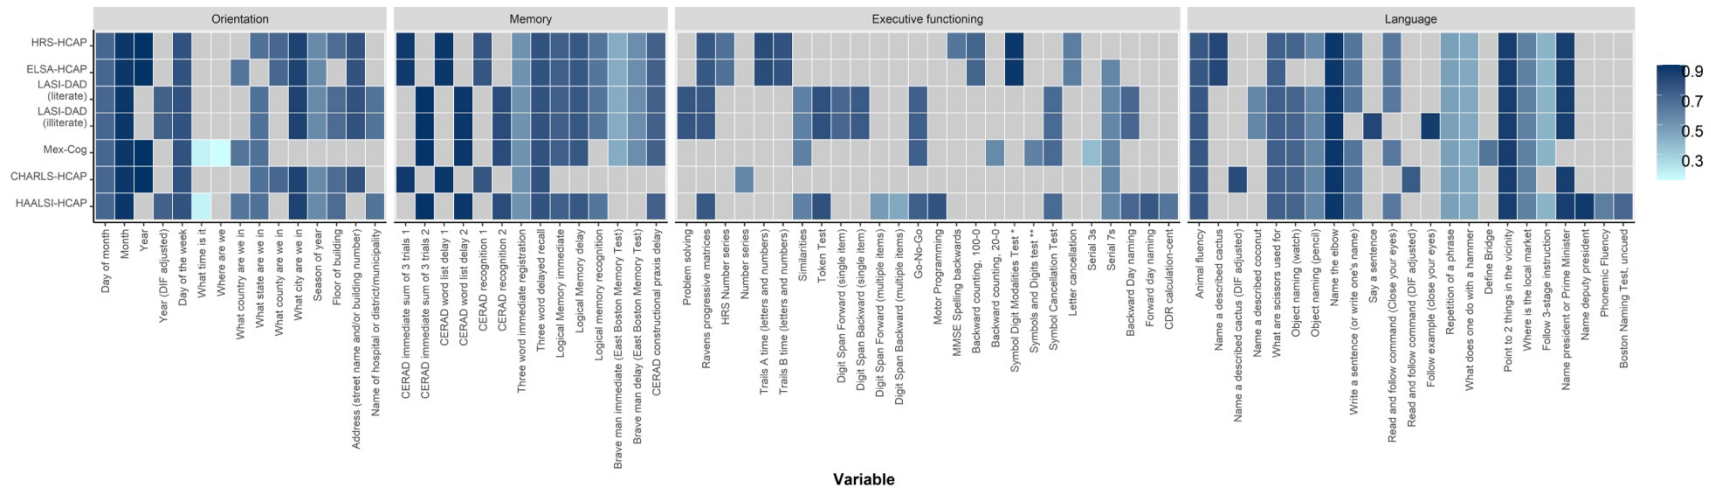

Figure 1. Heatmap of cognitive test items and their overlap across each study: Results from HCAP studies (N=21,141)

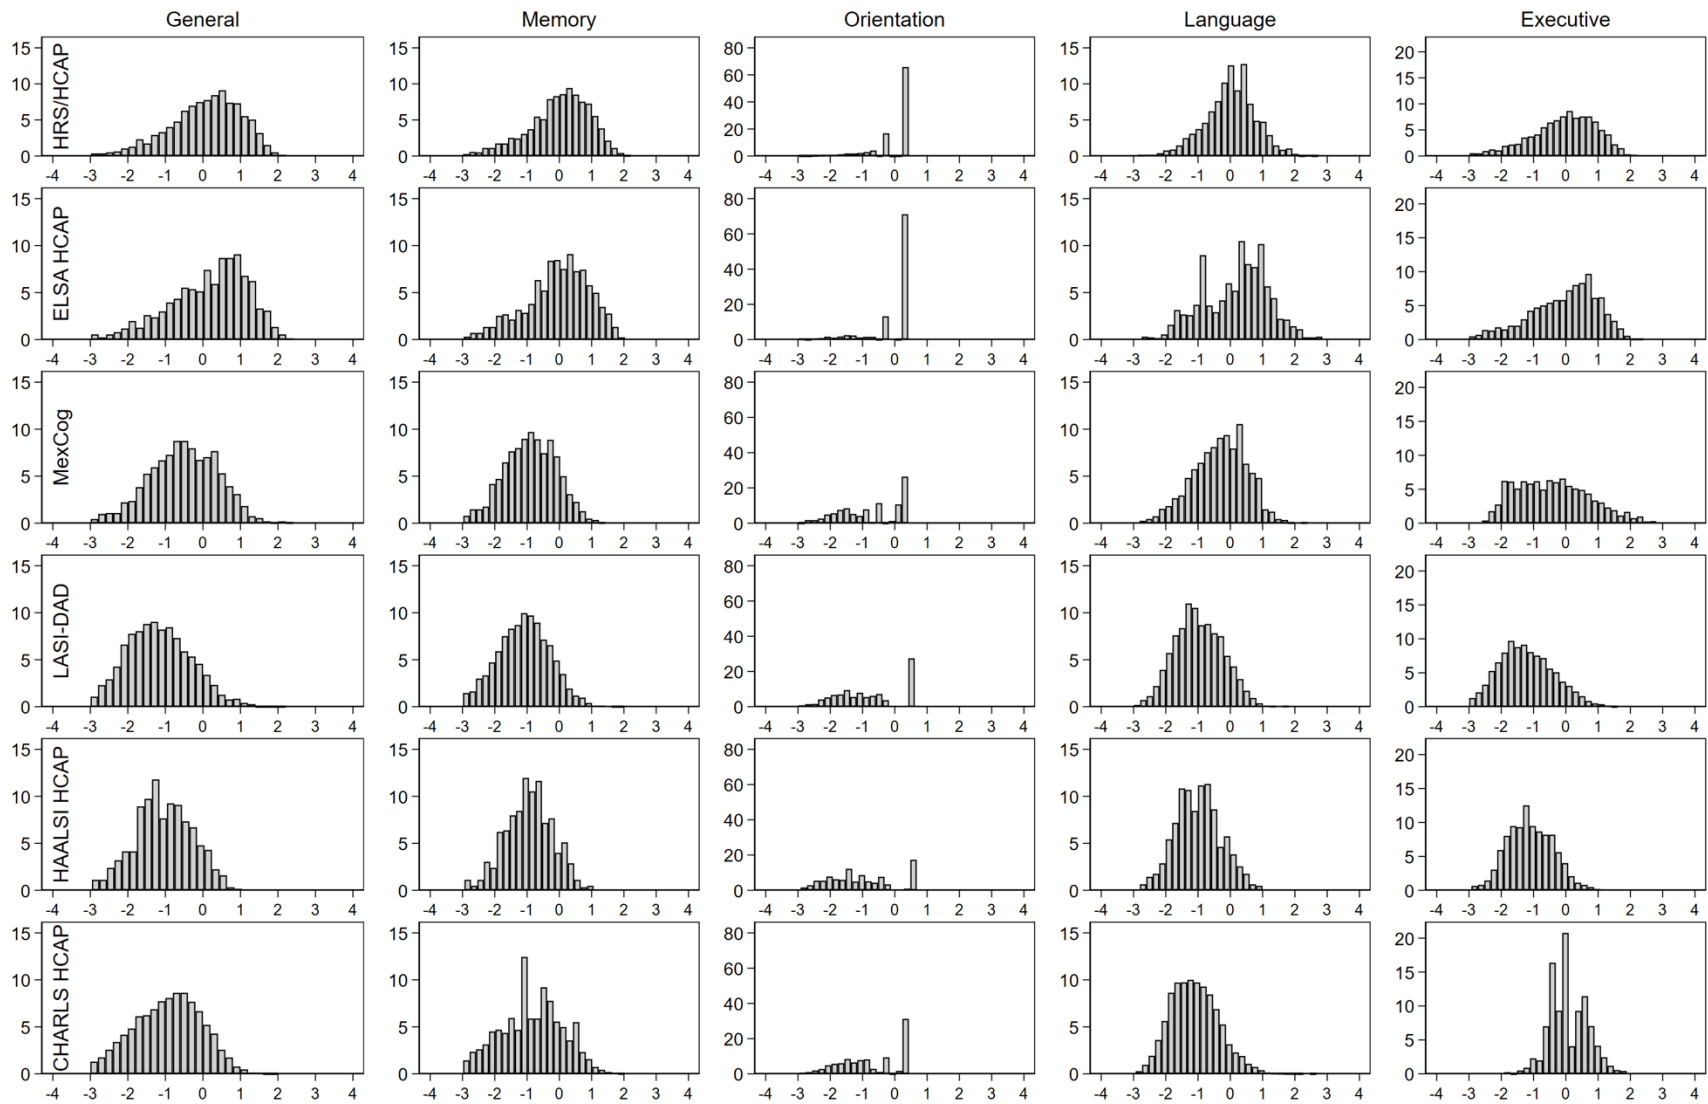

Figure 2. Distributions of harmonized general and domain-specific cognitive factor scores: Results from HCAP studies (N=21,141)



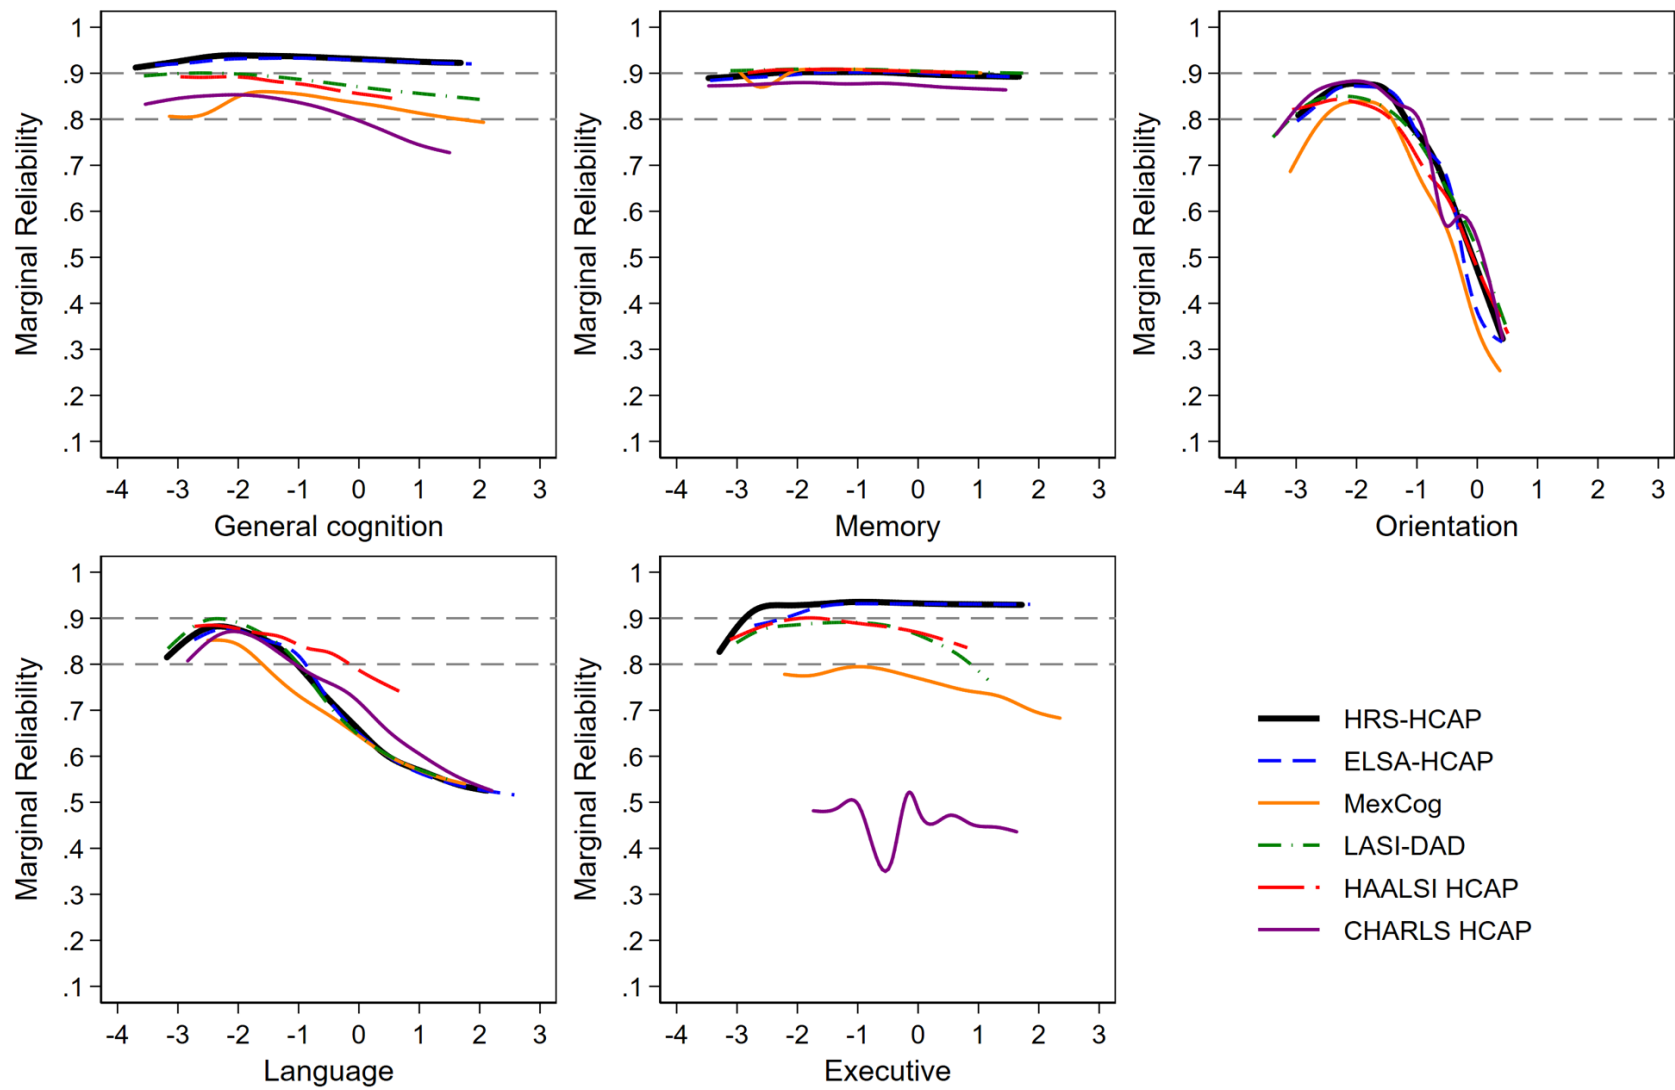

Figure 3. Plots of marginal reliability by study for overall and domain-specific cognitive performance: Results from HCAP studies (N=21,141)
